# Supplementary material for: Teriflunomide Is an Indirect Human Constitutive Androstane Receptor (CAR) Activator Interacting With Epidermal Growth Factor (EGF) Signaling
Source: PubMed Central journal article supplement (PMC6193428; doi:10.3389/fphar.2018.00993), 2018-10-11
Supplement: Data_Sheet_1.pdf [file Data_Sheet_1.pdf]

## Supplementary data

Carazo et al.

Figure 1S

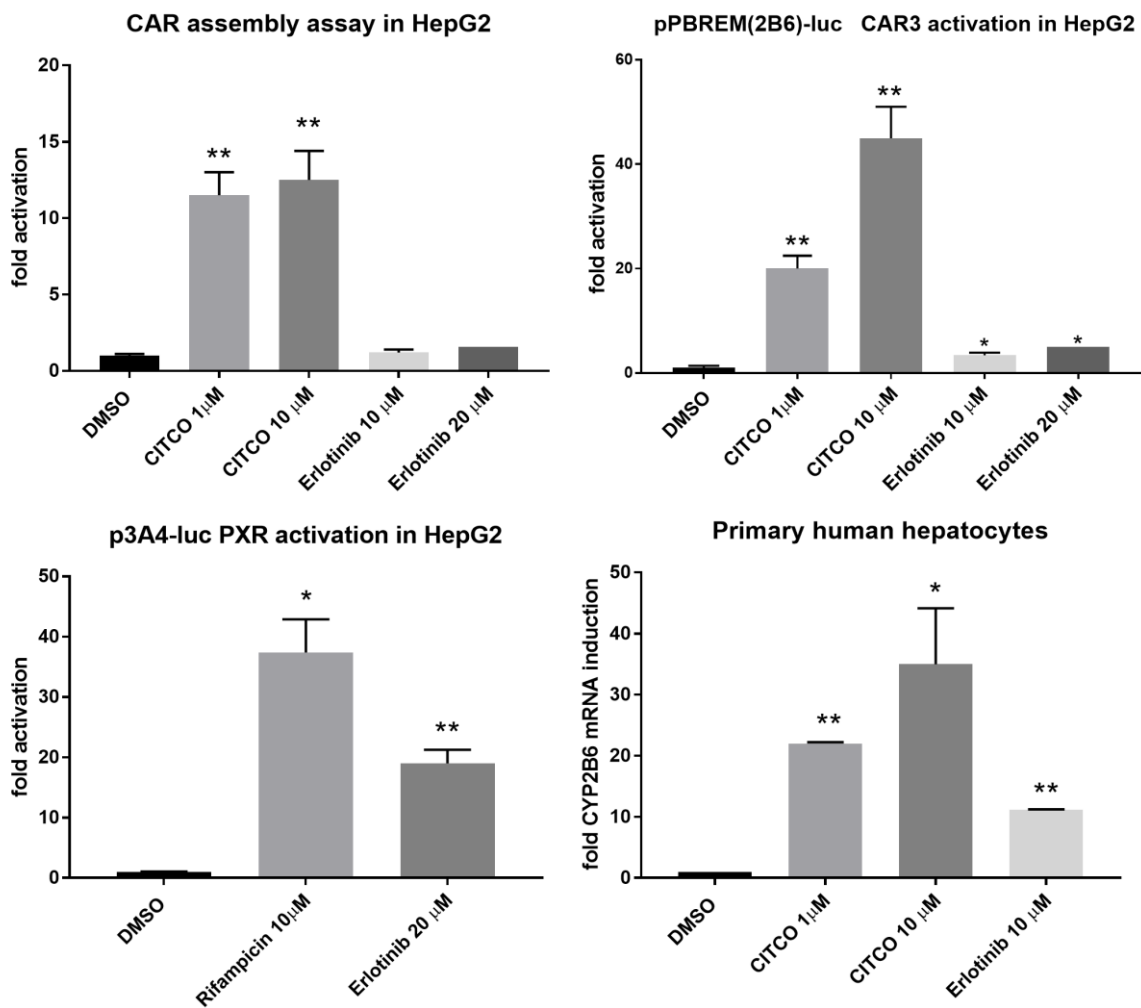

**Figure 1S. Erlotinib is a weak activator of CAR3 variant and PXR ligand.** Luciferase reporter gene assays with CAR- and PXR-responsive promoter constructs have been performed in HepG2 cells treated for 24 h with CITCO, rifampicin and erlotinib. Data are presented as means  $\pm$ SD and indicate fold activation to vehicle-treated cells. \* $P < 0.05$ , \*\* $P < 0.01$ , \*\*\* $P < 0.001$  – statistically significant difference compared to control vehicle-treated cells.

Figure 2S.

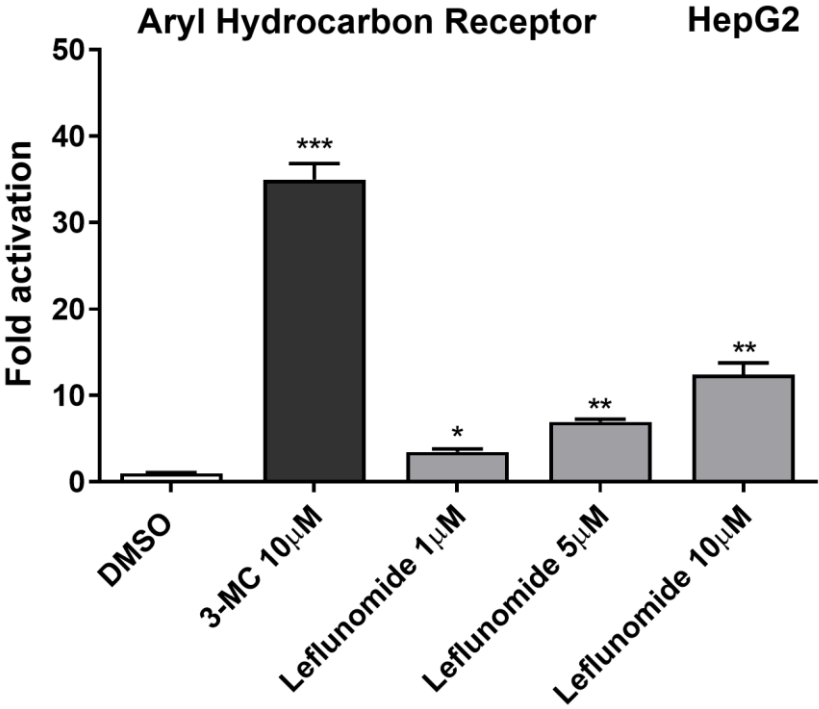

**Figure 2S. Leflunomide activates Aryl hydrocarbon receptor.** HepG2 cells have been transfected with p1A1-luc luciferase reporter AHR-responsive construct. After 24 h, cells were treated with an AHR ligand 3-methylcholantrene (3-MC) or leflunomide (1; 5 or 10 μM) for 24 h. Data are presented as fold activation to vehicle (DMSO)-treated cells. , \* $P < 0.05$ , \*\* $P < 0.01$ , \*\*\* $P < 0.001$  – statistically significant difference compared to control vehicle-treated cells.
